# Supplementary material for: The spread of the first introns in proto-eukaryotic paralogs
Source: PubMed Central journal article supplement (PMC9120149; doi:10.1038/s42003-022-03426-5), 2022-05-19
Supplement: 42003_2022_3426_MOESM3_ESM.pdf [file 42003_2022_3426_MOESM3_ESM.pdf]

## Description of Additional Supplementary Files

**File name:** Supplementary Data 1

**Description:** KOG clusters

**File name:** Supplementary Data 2

**Description:** Species list with links to used genome annotation files

**File name:** Supplementary Data 3

**Description:** Pairwise comparisons of functions of pairs of KOGs with and without introns (unique versus shared introns).

**File name:** Supplementary Data 4

**Description:** Pairwise comparisons of functions of Pfam duplications with and without introns (duplications with versus without preduplication introns).

**File name:** Supplementary Data 5

**Description:** Pairwise comparisons of localisations of Pfam duplications with and without introns (duplications with versus without preduplication introns).

**File name:** Supplementary Data 6

**Description:** Pairwise comparisons of functions of pairs of Pfam OGs with and without introns (unique versus shared introns).

**File name:** Supplementary Data 7

**Description:** Pairwise comparisons of localisations of pairs of Pfam OGs with and without introns (unique versus shared introns).

**File name:** Supplementary Data 8

**Description:** Pairwise comparisons of functions of KOGs with shared introns regarding intron type.

**File name:** Supplementary Data 9

**Description:** Pairwise comparisons of functions of Pfam duplications with introns regarding intron type.

**File name:** Supplementary Data 10

**Description:** The source data behind the graphs in the paper
